# Supplementary material for: Sex- and age-specific migratory strategies of blue whales in the northeast Pacific Ocean
Source: Frontiers journal article supplement (doi:10.3389/fmars.2022.944918), 2022-09-02
Supplement: Table_6.DOCX [file Table_6.DOCX]

**Supplementary Table 6.** Standardized posterior probabilities of the relative contribution of prey sources to thirteen individual blue whales using Model #4 from Table S5. Model results include the posterior means, standard deviations (SD), medians (50%), and credible intervals (2.5%, 50%, 97.5%). GC: Gulf of California, CCE: California Current Ecosystem, and CRD: Costa Rica Dome.

| Whale ID | Prey | Mean | SD | 2.5% | 50% | 97.5% |
| --- | --- | --- | --- | --- | --- | --- |
| *A* | GC | 0.43 | 0.04 | 0.36 | 0.43 | 0.51 |
| CCE | 0.07 | 0.06 | 0.00 | 0.06 | 0.21 |
| CRD | 0.50 | 0.05 | 0.38 | 0.50 | 0.59 |
| *B* | GC | 0.11 | 0.04 | 0.05 | 0.11 | 0.19 |
| CCE | 0.50 | 0.08 | 0.33 | 0.50 | 0.65 |
| CRD | 0.39 | 0.06 | 0.28 | 0.38 | 0.52 |
| *C* | GC | 0.25 | 0.03 | 0.19 | 0.25 | 0.32 |
| CCE | 0.44 | 0.08 | 0.28 | 0.44 | 0.57 |
| CRD | 0.31 | 0.06 | 0.21 | 0.31 | 0.43 |
| *D* | GC | 0.03 | 0.02 | 0.00 | 0.03 | 0.08 |
| CCE | 0.93 | 0.06 | 0.79 | 0.95 | 1.00 |
| CRD | 0.04 | 0.04 | 0.00 | 0.03 | 0.12 |
| *E* | GC | 0.05 | 0.02 | 0.02 | 0.05 | 0.09 |
| CCE | 0.91 | 0.04 | 0.81 | 0.92 | 0.97 |
| CRD | 0.04 | 0.03 | 0.00 | 0.03 | 0.11 |
| *F* | GC | 0.02 | 0.02 | 0.00 | 0.02 | 0.06 |
| CCE | 0.94 | 0.05 | 0.81 | 0.96 | 1.00 |
| CRD | 0.04 | 0.04 | 0.00 | 0.03 | 0.13 |
| *G* | GC | 0.03 | 0.03 | 0.00 | 0.03 | 0.10 |
| CCE | 0.89 | 0.10 | 0.67 | 0.92 | 1.00 |
| CRD | 0.08 | 0.08 | 0.00 | 0.06 | 0.23 |
| *H* | GC | 0.49 | 0.04 | 0.42 | 0.49 | 0.57 |
| CCE | 0.14 | 0.08 | 0.01 | 0.14 | 0.30 |
| CRD | 0.37 | 0.06 | 0.25 | 0.37 | 0.49 |
| *I* | GC | 0.19 | 0.06 | 0.07 | 0.19 | 0.29 |
| CCE | 0.15 | 0.11 | 0.00 | 0.13 | 0.39 |
| CRD | 0.67 | 0.09 | 0.49 | 0.68 | 0.82 |
| *J* | GC | 0.59 | 0.03 | 0.53 | 0.59 | 0.66 |
| CCE | 0.04 | 0.04 | 0.00 | 0.03 | 0.15 |
| CRD | 0.37 | 0.05 | 0.27 | 0.37 | 0.45 |
| *K* | GC | 0.04 | 0.03 | 0.00 | 0.04 | 0.11 |
| CCE | 0.70 | 0.07 | 0.54 | 0.70 | 0.82 |
| CRD | 0.26 | 0.05 | 0.17 | 0.26 | 0.38 |
| *L* | GC | 0.04 | 0.04 | 0.00 | 0.03 | 0.14 |
| CCE | 0.45 | 0.12 | 0.16 | 0.47 | 0.64 |
| CRD | 0.51 | 0.10 | 0.35 | 0.50 | 0.75 |
| *M* | GC | 0.37 | 0.05 | 0.28 | 0.38 | 0.46 |
| CCE | 0.09 | 0.08 | 0.00 | 0.08 | 0.27 |
| CRD | 0.53 | 0.07 | 0.40 | 0.54 | 0.65 |
